# Supplementary material for: Characterization of lipase fromCandida rugosaentrapped in alginate beads to enhance its thermal stability and recyclability
Source: Royal Society of Chemistry journal article supplement (doi:10.1039/d2nj01160c), 2022-01-01
Supplement: d2nj01160c1.pdf [file d2nj01160c1.pdf]

## Supplementary Information

### Characterization of lipase from *Candida rugosa* entrapped in alginate beads to enhance its thermal stability and recyclability

Alice Vetrano<sup>a</sup>, Francesco Gabriele<sup>a</sup>, Raimondo Germani<sup>b</sup> and Nicoletta Spreti<sup>a\*</sup>

<sup>a</sup> Department of Physical and Chemical Sciences, University of L'Aquila, Via Vetoio – Coppito, I-67100 L'Aquila, Italy

<sup>b</sup> CEMIN, Centre of Excellence on Nanostructured Innovative Materials, Department of Chemistry, Biology and Biotechnology, University of Perugia, Via Elce di Sotto 8, I-06123 Perugia, Italy

To whom correspondence should be addressed.

E-mail: [nicoletta.spreti@univaq.it](mailto:nicoletta.spreti@univaq.it)

## ALGINATE CHARACTERIZATION

### M/G ratio

The determination of the M/G ratio of sodium alginate was performed using two spectroscopic methods: FTIR-ATR and NMR. The IR spectrum of the sodium alginate were acquired using the FTIR Spectrum Two (Perkin-Elmer) equipped with a UATR module at room temperature in a scan range between 4000 and 450  $\text{cm}^{-1}$ , with 4 accumulations and at a resolution of 4  $\text{cm}^{-1}$ . The mannuronate to guluronate ratio was firstly calculated according to Gómez-Ordóñez and co-workers through the ratio between the maximum intensity of the absorption bands centred at 1030 and 1080  $\text{cm}^{-1}$  ( $A_{1030}/A_{1080}$ ); these two bands are typical of the mannuronate (O-H bending) and guluronate (C-O-C stretching) subunit respectively <sup>1,2</sup>.

The M/G ratio was also determined through NMR spectroscopy by applying the experimental procedure already reported in the literature <sup>3</sup>. An alginate solution 100 mg/ml were prepared in D<sub>2</sub>O at pD=7 and placed in an NMR tube; the NMR spectrum has been acquired at the frequency of 50 MHz with pulse duration of 0.8 s and 40000 scans. Moreover, in order to minimize the drawbacks related to the viscosity of the alginate sample, the temperature of the probe has been set at 90 °C. The M/G value was obtained from the average between the integral ratios of all the individual carbon peaks of the mannuronate subunit and the guluronate ones.

### Molecular weight

The determination of the average molecular weight of sodium alginate was obtained adopting the viscosimetric approach based on the Mark-Houwink-Sakurada relationship reported below:

$$[\eta] = K \cdot \overline{MW}^a$$

The values of K and *a* used for the determination of the MW of alginate are  $7.3 \times 10^{-5}$  dL/g and 0.92 for the measurements carried out in a 0.1 M sodium chloride solution and  $1.23 \times 10^{-4}$  dL/g and 0.96 in distilled water <sup>4</sup>. The viscosity of alginate solutions, measured by ranging the biopolymer concentration from 0.1 to 7 g/dL, increases exponentially increasing its concentration; therefore, in order to extrapolate the intrinsic viscosity only the first stroke of the curve, comprise between 0.1 and 1.5 g/dL was considered.

**Table S1** The maximum intensity of IR absorption bands centred at 1030 ( $A_{1030}$ ) and 1080  $\text{cm}^{-1}$  ( $A_{1080}$ ), corresponding to O-H bending of mannuronate and C-O-C stretching of guluronate respectively, have been used to calculate M/G ratio of alginate through their ratio ( $A_{1030}/A_{1080}$ ).

| $A_{1030}$               | $A_{1080}$ | $A_{1030}/A_{1080}$ |
|--------------------------|------------|---------------------|
| 1.27                     | 0.67       | 1.90                |
| 0.97                     | 0.57       | 1.70                |
| 0.89                     | 0.51       | 1.75                |
| 0.96                     | 0.50       | 1.92                |
| <b>Average M/G ratio</b> |            | <b>1.82 ± 0.11</b>  |

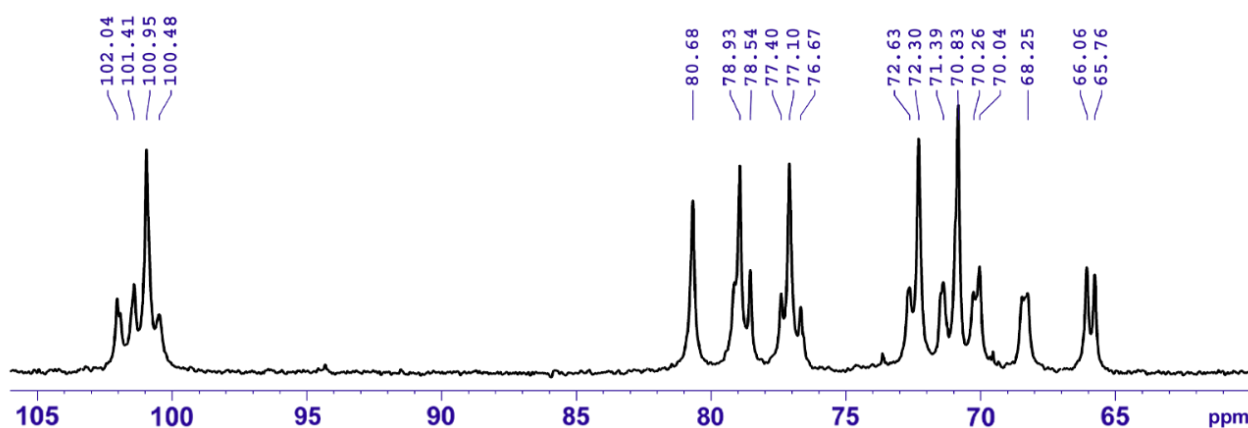

**Fig. S1**  $^{13}\text{C}$ -NMR spectrum of an alginate solution 100 mg/ml prepared in  $\text{D}_2\text{O}$  at pD = 7.

**Table S2** Carbon integrals values of mannuronate and guluronate subunits, obtained from  $^{13}\text{C}$  NMR analysis and the M/G ratios obtained. The average M/G ratio is also reported with its associated standard deviation.

|                          | <b>C1</b> | <b>C2</b> | <b>C3</b> | <b>C4</b>        | <b>C5</b> |
|--------------------------|-----------|-----------|-----------|------------------|-----------|
| <b>M</b>                 | 2629.99   | 3416.12   | 2508.90   | 2519.38          | 2444.70   |
| <b>G</b>                 | 1488.36   | 1232.44   | 1711.23   | 1439.38          | 1364.14   |
| <b>M/G</b>               | 1.77      | 1.71      | 1.82      | 1.75             | 1.79      |
| <b>Average M/G ratio</b> |           |           |           | <b>1.77±0.04</b> |           |

**Table S3** Enzyme concentration measured, by means of the Bradford method, in the storage solution for all six bead formulations

|                      | BEADS<br>1                                 | BEADS<br>2 | BEADS<br>3 | BEADS<br>4 | BEADS<br>5 | BEADS<br>6 |
|----------------------|--------------------------------------------|------------|------------|------------|------------|------------|
|                      | Enzyme loss, $\mu\text{g/ml}$ <sup>a</sup> |            |            |            |            |            |
| preparation solution | 0                                          | 0          | 0          | 0          | 0          | 0          |
| washing solution     | 0                                          | 0          | 0          | 0          | 0          | 10         |
| after 2h             | 0                                          | 7          | 0          | 7          | 0          | 0          |
| after 24h            | 0                                          | 10         | 0          | 0          | 0          | 0          |
| after 48h            | 30                                         | 14         | 12         | 15         | 0          | 0          |
| after 96h            | 30                                         | 12         | 0          | 0          | 0          | 0          |
| after 7d             | 27                                         | 13         | 0          | 0          | 0          | 0          |
| after 14d            | 31                                         | 15         | 11         | 9          | 0          | 0          |
| after 18d            | 38                                         | 22         | 12         | 8          | 14         | 14         |
| after 30d            | 35                                         | 22         | 11         | 0          | 12         | 0          |

<sup>a</sup> The sensitivity of the detection method is  $22 \mu\text{g/ml}$  <sup>5</sup>

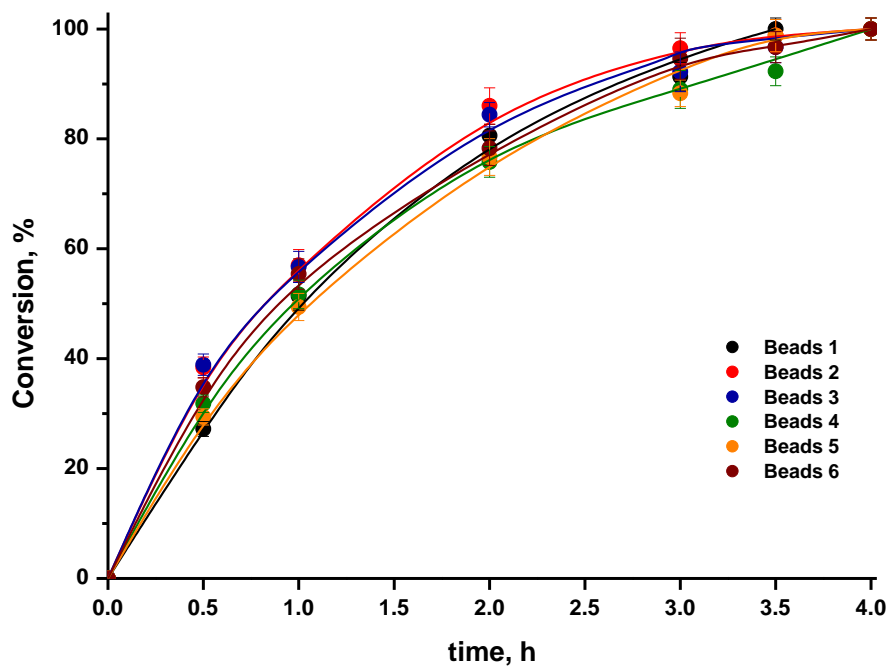

**Fig. S2** Substrate conversion percentages for all types of beads in distilled water as a function of time after one month of storage in distilled water at  $4 \text{ }^\circ\text{C}$ ;  $[p\text{-NPA}] = 10 \text{ mM}$ ,  $T = 25 \text{ }^\circ\text{C}$ .



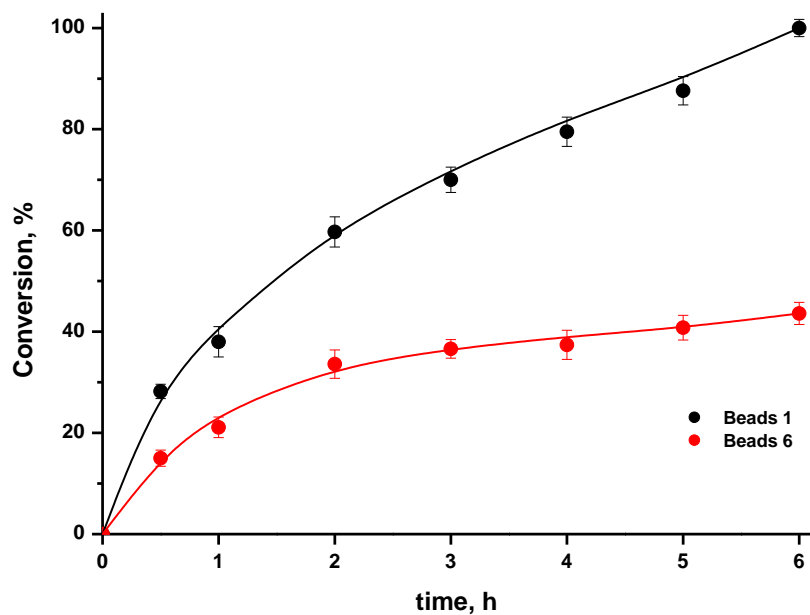

**Fig. S4** Substrate conversion percentages over time for **Beads 1** and **6** in *tert*-butyl alcohol as a function of time; [*p*-NPD] = 10 mM, T = 25 °C.

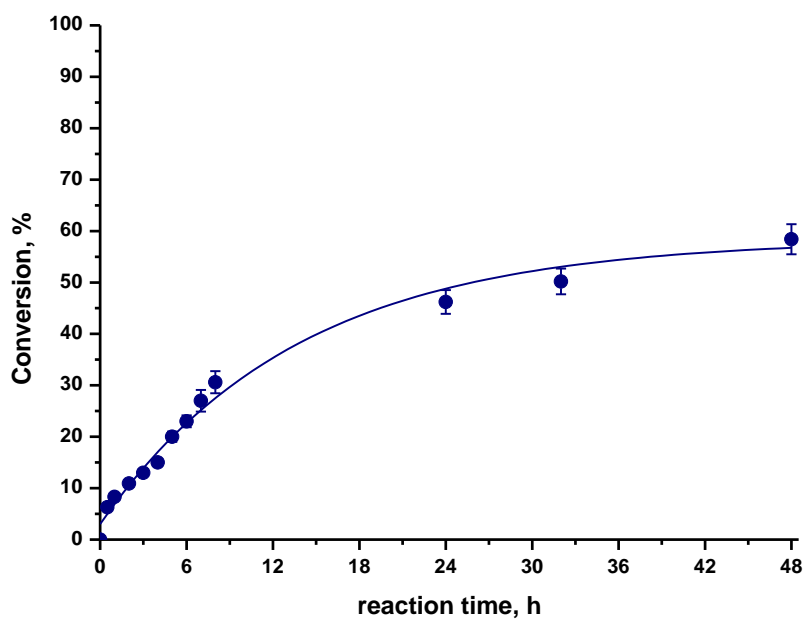

**Fig. S5** Substrate conversion percentages over time for the reaction catalyzed by **Beads 1** in *tert*-butyl alcohol; [*p*-NPA] = 10 mM, T = 25 °C.

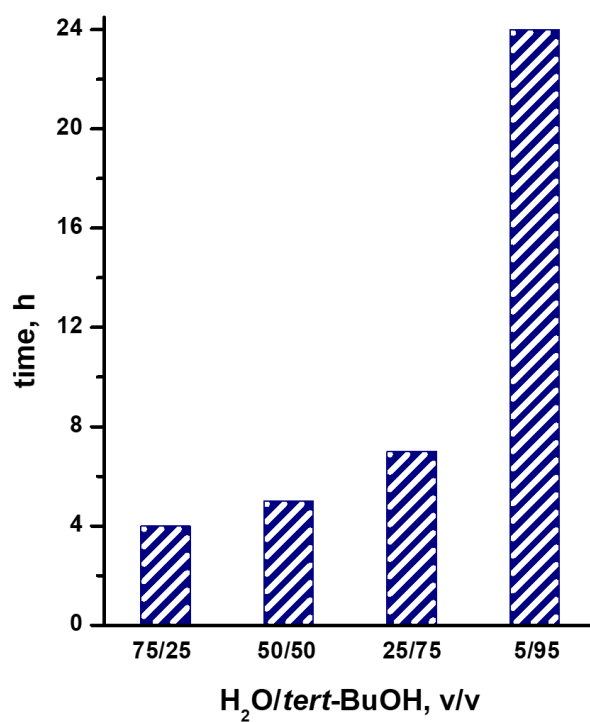

**Fig. S6** Effect of the percentage of water added to *tert*-butyl alcohol on time required for complete conversion of *p*-NPA performed by **Beads 1**; [*p*-NPA] = 10 mM, T = 25 °C.

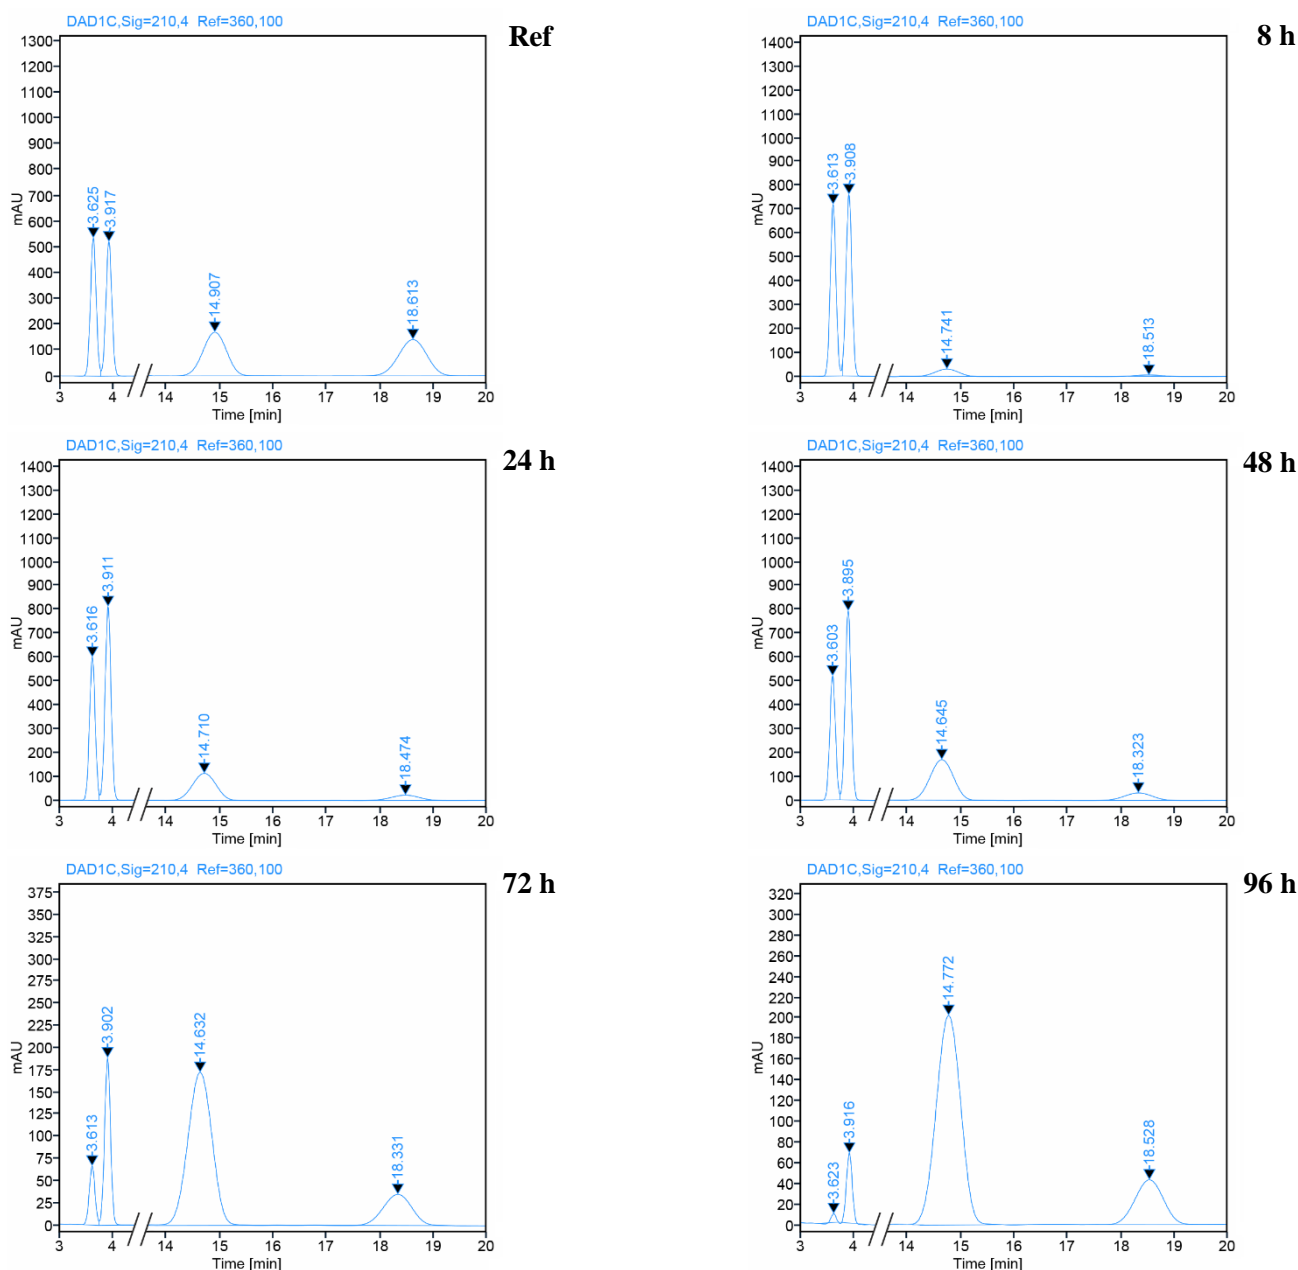

**Fig. S7** Different time chromatograms of the kinetic resolution of *rac*-1-phenylethyl acetate catalyzed by Beads 1. The retention times were 3.6, 3.9, 14.7 and 18.5 min for (*R*)-1-phenylethyl acetate, (*S*)-1-phenylethylacetate, (*R*)-1-phenylethanol and (*S*)-1-phenylethanol, respectively.

## References

- 1 E. Gómez-Ordóñez and P. Rupérez, *Food Hydrocoll.*, 2011, **25**, 1514–1520.
- 2 K. Sakugawa, A. Ikeda, A. Takemura and H. Ono, *J. Appl. Polym. Sci.*, 2004, **93**, 1372–1377.
- 3 H. Grasdalen, B. Larsen and O. Sminrod, *Carbohydr. Res.*, 1981, **89**, 179–191.
- 4 M. A. Masuelli and C. O. Illanes, *Int. J. Biomater. Sci. Eng.*, 2014, **1**, 1–11.
- 5 M. M. Bradford, *Anal. Biochem.*, 1976, **72**, 248–254.
